# Supplementary material for: Compromised Blood-Brain Barrier Junctions Enhance Melanoma Cell Intercalation and Extravasation
Source: MDPI journal article supplement (doi:10.3390/cancers15205071), 2023-10-20
Supplement: s1 [file s1]

Supplementary tables to

***Compromised blood-brain barrier junctions enhance melanoma cell intercalation and extravasation***

# Supplementary Table S1, calculation of data shown in Supplementary Figure S1A

| <b>A</b>                | 1st value after start of treatment |         |         |             |       | 3 hours after start of treatment |         |         |             |       |
|-------------------------|------------------------------------|---------|---------|-------------|-------|----------------------------------|---------|---------|-------------|-------|
|                         | ohm/cm <sup>2</sup>                |         |         |             |       | ohm/cm <sup>2</sup>              |         |         |             |       |
| Sample                  | Value 1                            | Value 2 | Value 3 | mean        | STDEV | Value 1                          | Value 2 | Value 3 | mean        | STDEV |
| Empty filter            | 5,54                               | 6,31    | 7,27    | <b>6,4</b>  | 0,87  | 5,47                             | 6,27    | 7,16    | <b>6,3</b>  | 0,85  |
| pMBMECs, no treatment   | 26,74                              | 24,1    | 27,7    | <b>26,2</b> | 1,86  | 25,07                            | 22,87   | 26,38   | <b>24,8</b> | 1,77  |
| pMBMECs +GM6001 (20 µM) | 22,16                              | 23,24   | 22,63   | <b>22,7</b> | 0,54  | 20,85                            | 21,85   | 21,97   | <b>21,6</b> | 0,61  |
| pMBMECs +DMSO (1:1000)  | 19,57                              | 22,46   | 21,17   | <b>21,1</b> | 1,45  | 18,67                            | 21,46   | 20,03   | <b>20,1</b> | 1,40  |

| <b>B</b>                | 1st value after start of treatment *) |         |         |             |       | 3 hours after start of treatment *) |         |         |             |       |
|-------------------------|---------------------------------------|---------|---------|-------------|-------|-------------------------------------|---------|---------|-------------|-------|
|                         | ohm/cm <sup>2</sup>                   |         |         |             |       | ohm/cm <sup>2</sup>                 |         |         |             |       |
| Sample                  | Value 1                               | Value 2 | Value 3 | mean        | STDEV | Value 1                             | Value 2 | Value 3 | mean        | STDEV |
| pMBMECs, no treatment   | 20,4                                  | 17,7    | 21,3    | <b>19,8</b> | 1,86  | 18,8                                | 16,6    | 20,1    | <b>18,5</b> | 1,77  |
| pMBMECs +GM6001 (20 µM) | 15,8                                  | 16,9    | 16,3    | <b>16,3</b> | 0,54  | 14,6                                | 15,6    | 15,7    | <b>15,3</b> | 0,61  |
| pMBMECs +DMSO (1:1000)  | 13,2                                  | 16,1    | 14,8    | <b>14,7</b> | 1,45  | 12,4                                | 15,2    | 13,7    | <b>13,8</b> | 1,40  |

\*) mean of empty filter values subtracted

| <b>C</b>                | 1st value after start of treatment |         |         |  |  | 3 hours after start of treatment |         |         |             |       |
|-------------------------|------------------------------------|---------|---------|--|--|----------------------------------|---------|---------|-------------|-------|
|                         | set to 100 %                       |         |         |  |  | relative to 1st value            |         |         |             |       |
| Sample                  | Value 1                            | Value 2 | Value 3 |  |  | Value 1                          | Value 2 | Value 3 | mean        | STDEV |
| pMBMECs, no treatment   | 100                                | 100     | 100     |  |  | 92,16                            | 93,47   | 94,15   | <b>93,3</b> | 1,01  |
| pMBMECs +GM6001 (20 µM) | 100                                | 100     | 100     |  |  | 92,17                            | 92,19   | 96,39   | <b>93,6</b> | 2,43  |
| pMBMECs +DMSO (1:1000)  | 100                                | 100     | 100     |  |  | 93,74                            | 94,24   | 92,79   | <b>93,6</b> | 0,74  |

\*\*) mean of pMBMECs, no treatment, 3 hours after start of treatment set to 100 %.

\*\*\*) TEER values are expressed relative to the mean of pMBMECs, no treatment, after 3 hours set to 100 %.

| 3 hours after start of treatment |         |         |        |              |      |
|----------------------------------|---------|---------|--------|--------------|------|
| data shwon in Fig 3A             |         |         |        |              |      |
| Value 1                          | Value 2 | Value 3 | mean   | STDEV        |      |
| **)                              | 98,82   | 100,23  | 100,96 | <b>100,0</b> | 1,09 |
| ***)                             | 98,82   | 98,85   | 103,35 | <b>100,3</b> | 2,61 |
| ***)                             | 100,51  | 101,05  | 99,49  | <b>100,3</b> | 0,79 |

Supplementary Table S1. **A** lists the initial absolute TEER values. **B** lists the absolute TEER values subtracted by mean TEER values of the empty filters. **C** shows the calculation of the data shown in Supplementary Figure 1A.

Supplementary Table S2, calculation of data shown in Supplementary Figure S1B.

A

| time (h) | Empty filler (Experiment A) |      |      |      |       | Empty filler (Experiment B) |      |      |      |       | pMBECs, no treatment (Exp A) |       |       |       |       | pMBECs, no treatment (Exp B) |       |       |       |       | pMBECs +B78chOVA (Exp A) |       |       |       |       |       |       |       |       |       | pMBECs +B78chOVA +GM6001 (20µM) (Exp A) |       |       |       |       |       |       |       |       |       |       |       |
|----------|-----------------------------|------|------|------|-------|-----------------------------|------|------|------|-------|------------------------------|-------|-------|-------|-------|------------------------------|-------|-------|-------|-------|--------------------------|-------|-------|-------|-------|-------|-------|-------|-------|-------|-----------------------------------------|-------|-------|-------|-------|-------|-------|-------|-------|-------|-------|-------|
|          | sample                      |      |      |      |       | sample                      |      |      |      |       | sample                       |       |       |       |       | sample                       |       |       |       |       | sample                   |       |       |       |       |       |       |       |       |       | sample                                  |       |       |       |       |       |       |       |       |       |       |       |
|          | 1                           | 2    | 3    | mean | STDEV | 1                           | 2    | 3    | mean | STDEV | 1                            | 2     | 3     | mean  | STDEV | 1                            | 2     | 3     | mean  | STDEV | 1                        | 2     | 3     | 4     | 5     | 6     | 7     | 8     | 9     | mean  | STDEV                                   | 1     | 2     | 3     | 4     | 5     | 6     | 7     | 8     | 9     | mean  | STDEV |
|          | ohm/cm <sup>2</sup>         |      |      |      |       | ohm/cm <sup>2</sup>         |      |      |      |       | ohm/cm <sup>2</sup>          |       |       |       |       | ohm/cm <sup>2</sup>          |       |       |       |       | ohm/cm2                  |       |       |       |       |       |       |       |       |       | ohm/cm2                                 |       |       |       |       |       |       |       |       |       |       |       |
| start(0) | 7.25                        | 8.73 | 8.55 | 8.18 | 0.81  | 5.54                        | 6.31 | 7.27 | 6.37 | 0.87  | 18.04                        | 20.61 | 20.33 | 19.66 | 1.41  | 26.74                        | 24.10 | 27.70 | 26.18 | 1.86  | 23.63                    | 22.55 | 21.24 | 21.07 | 21.28 | 20.55 | 20.53 | 20.54 | 17.79 | 21.02 | 1.60                                    | 19.80 | 20.53 | 19.46 | 19.85 | 19.19 | 20.81 | 18.42 | 20.20 | 18.43 | 19.63 | 0.85  |
| 0.25     | 7.39                        | 8.79 | 8.61 | 8.26 | 0.76  | 5.55                        | 6.33 | 7.26 | 6.38 | 0.86  | 17.85                        | 20.39 | 20.12 | 19.45 | 1.40  | 26.18                        | 23.89 | 27.43 | 25.83 | 1.80  | 22.34                    | 21.12 | 19.86 | 19.49 | 19.92 | 19.22 | 19.23 | 19.20 | 16.62 | 19.67 | 1.55                                    | 19.61 | 20.22 | 19.19 | 19.49 | 18.94 | 20.50 | 18.20 | 19.85 | 18.15 | 19.35 | 0.82  |
| 0.50     | 7.49                        | 8.77 | 8.61 | 8.29 | 0.70  | 5.53                        | 6.33 | 7.25 | 6.37 | 0.86  | 17.69                        | 20.31 | 19.95 | 19.42 | 1.26  | 25.86                        | 23.71 | 27.29 | 25.62 | 1.80  | 21.57                    | 20.33 | 19.09 | 18.65 | 19.06 | 18.43 | 18.48 | 18.47 | 15.84 | 18.88 | 1.55                                    | 19.62 | 20.22 | 19.05 | 19.25 | 18.71 | 20.58 | 18.04 | 19.64 | 17.99 | 19.14 | 0.79  |
| 0.75     | 7.66                        | 8.80 | 8.69 | 8.38 | 0.63  | 5.56                        | 6.36 | 7.28 | 6.40 | 0.86  | 17.54                        | 20.06 | 19.70 | 19.10 | 1.36  | 25.78                        | 23.75 | 27.27 | 25.60 | 1.77  | 21.25                    | 19.94 | 18.81 | 18.25 | 18.63 | 18.06 | 18.15 | 18.14 | 15.47 | 18.52 | 1.56                                    | 19.15 | 19.62 | 18.80 | 18.97 | 18.47 | 20.05 | 17.82 | 19.36 | 17.71 | 18.88 | 0.78  |
| 1.00     | 7.77                        | 8.77 | 8.70 | 8.41 | 0.56  | 5.48                        | 6.30 | 7.20 | 6.33 | 0.86  | 17.43                        | 19.89 | 19.52 | 18.95 | 1.33  | 25.82                        | 23.73 | 27.31 | 25.62 | 1.80  | 21.06                    | 19.74 | 18.71 | 17.91 | 18.43 | 17.87 | 17.93 | 17.89 | 15.22 | 18.31 | 1.58                                    | 18.85 | 19.34 | 18.48 | 18.65 | 18.18 | 19.73 | 17.47 | 19.06 | 17.32 | 18.56 | 0.81  |
| 1.25     | 7.95                        | 8.76 | 8.79 | 8.50 | 0.48  | 5.58                        | 6.38 | 7.31 | 6.42 | 0.87  | 17.28                        | 19.71 | 19.30 | 18.76 | 1.30  | 25.86                        | 23.74 | 27.27 | 25.62 | 1.78  | 20.71                    | 19.49 | 18.49 | 17.51 | 18.12 | 17.68 | 17.52 | 17.65 | 14.84 | 18.00 | 1.60                                    | 18.51 | 19.02 | 18.12 | 18.34 | 17.83 | 19.33 | 17.18 | 18.72 | 16.95 | 18.22 | 0.80  |
| 1.50     | 7.98                        | 8.77 | 8.88 | 8.54 | 0.49  | 5.54                        | 6.38 | 7.29 | 6.40 | 0.88  | 17.20                        | 19.52 | 19.05 | 18.59 | 1.23  | 25.80                        | 23.62 | 27.20 | 25.54 | 1.80  | 20.28                    | 19.06 | 18.03 | 17.06 | 17.81 | 17.29 | 17.18 | 17.41 | 14.53 | 17.63 | 1.56                                    | 18.18 | 18.72 | 17.77 | 18.00 | 17.50 | 19.00 | 16.79 | 18.38 | 16.60 | 17.88 | 0.81  |
| 1.75     | 8.12                        | 8.88 | 9.09 | 8.70 | 0.51  | 5.51                        | 6.33 | 7.24 | 6.36 | 0.87  | 17.15                        | 19.45 | 18.96 | 18.52 | 1.21  | 25.69                        | 23.51 | 27.02 | 25.41 | 1.77  | 19.84                    | 18.67 | 17.53 | 16.51 | 17.30 | 16.94 | 16.79 | 17.00 | 14.11 | 17.19 | 1.56                                    | 17.85 | 18.38 | 17.33 | 17.67 | 17.15 | 18.59 | 16.46 | 18.05 | 16.23 | 17.52 | 0.81  |
| 2.00     | 8.24                        | 8.94 | 9.22 | 8.80 | 0.50  | 5.55                        | 6.35 | 7.26 | 6.39 | 0.86  | 17.18                        | 19.44 | 18.97 | 18.53 | 1.19  | 25.61                        | 23.38 | 26.97 | 25.32 | 1.81  | 19.51                    | 18.11 | 16.91 | 16.07 | 16.76 | 16.46 | 16.35 | 16.51 | 13.70 | 16.71 | 1.56                                    | 17.71 | 18.22 | 17.06 | 17.43 | 16.97 | 18.40 | 16.16 | 17.76 | 15.95 | 17.30 | 0.85  |
| 2.25     | 8.32                        | 8.99 | 9.34 | 8.88 | 0.52  | 5.48                        | 6.32 | 7.21 | 6.34 | 0.87  | 17.29                        | 19.52 | 19.13 | 18.65 | 1.19  | 25.42                        | 23.27 | 26.91 | 25.20 | 1.83  | 19.03                    | 17.62 | 16.40 | 15.51 | 16.22 | 15.98 | 15.94 | 15.91 | 13.31 | 16.21 | 1.54                                    | 17.64 | 18.06 | 16.82 | 17.20 | 16.84 | 18.22 | 16.01 | 17.59 | 15.76 | 17.14 | 0.86  |
| 2.50     | 8.42                        | 9.11 | 9.43 | 8.99 | 0.52  | 5.47                        | 6.28 | 7.20 | 6.32 | 0.87  | 17.45                        | 19.65 | 19.34 | 18.81 | 1.19  | 25.33                        | 23.19 | 26.31 | 24.94 | 1.80  | 18.64                    | 17.15 | 16.05 | 15.15 | 15.92 | 15.59 | 15.65 | 15.55 | 13.04 | 15.86 | 1.50                                    | 17.58 | 18.05 | 16.67 | 17.34 | 16.79 | 18.14 | 15.91 | 17.57 | 15.63 | 17.06 | 0.89  |
| 2.75     | 8.44                        | 9.08 | 9.44 | 8.99 | 0.51  | 5.51                        | 6.31 | 7.21 | 6.34 | 0.85  | 17.57                        | 19.74 | 19.47 | 18.93 | 1.18  | 25.23                        | 23.05 | 25.83 | 24.70 | 1.46  | 18.36                    | 16.90 | 15.88 | 14.90 | 15.71 | 15.37 | 15.45 | 15.35 | 12.82 | 15.64 | 1.49                                    | 17.63 | 18.00 | 16.62 | 17.25 | 16.80 | 18.07 | 15.87 | 17.57 | 15.65 | 17.05 | 0.88  |
| 3.00     | 8.44                        | 9.15 | 9.48 | 9.02 | 0.53  | 5.47                        | 6.27 | 7.16 | 6.30 | 0.85  | 17.68                        | 19.79 | 19.50 | 18.99 | 1.14  | 25.07                        | 22.87 | 26.38 | 24.77 | 1.77  | 18.18                    | 16.73 | 15.87 | 14.68 | 15.59 | 15.28 | 15.40 | 15.21 | 12.72 | 15.52 | 1.47                                    | 17.59 | 17.92 | 16.57 | 17.20 | 16.78 | 17.97 | 15.69 | 17.45 | 15.58 | 16.97 | 0.89  |

B

| time (h) | pMBECs, no treatment (Exp A) |   |   |      |       | pMBECs, no treatment (Exp B) |       |       |       |       | pMBECs +B78chOVA (Exp A) |       |       |       |      |       |       |       |       |       | pMBECs +B78chOVA +GM6001 (20µM) (Exp A) |       |       |      |       |      |       |       |       |       |       |       |       |       |       |       |      |
|----------|------------------------------|---|---|------|-------|------------------------------|-------|-------|-------|-------|--------------------------|-------|-------|-------|------|-------|-------|-------|-------|-------|-----------------------------------------|-------|-------|------|-------|------|-------|-------|-------|-------|-------|-------|-------|-------|-------|-------|------|
|          | sample                       |   |   |      |       | sample                       |       |       |       |       | sample                   |       |       |       |      |       |       |       |       |       | sample                                  |       |       |      |       |      |       |       |       |       |       |       |       |       |       |       |      |
|          | 1                            | 2 | 3 | mean | STDEV | 1                            | 2     | 3     | mean  | STDEV | 1                        | 2     | 3     | 4     | 5    | 6     | 7     | 8     | 9     | mean  | STDEV                                   | 1     | 2     | 3    | 4     | 5    | 6     | 7     | 8     | 9     | mean  | STDEV |       |       |       |       |      |
|          | ohm/cm <sup>2</sup>          |   |   |      |       | ohm/cm <sup>2</sup>          |       |       |       |       | ohm/cm2                  |       |       |       |      |       |       |       |       |       | ohm/cm2                                 |       |       |      |       |      |       |       |       |       |       |       |       |       |       |       |      |
| start(0) |                              |   |   |      |       | 9.86                         | 12.43 | 12.15 | 11.48 | 1.41  | 20.37                    | 17.73 | 21.33 | 19.81 | 1.86 | 15.45 | 14.37 | 13.06 | 12.89 | 13.10 | 12.37                                   | 12.35 | 12.36 | 9.61 | 12.84 | 1.60 | 11.62 | 12.35 | 11.28 | 11.67 | 11.01 | 12.63 | 10.24 | 12.02 | 10.25 | 11.46 | 0.85 |
| 0.25     |                              |   |   |      |       | 9.59                         | 12.13 | 11.86 | 11.19 | 1.40  | 19.80                    | 17.51 | 21.05 | 19.45 | 1.80 | 14.08 | 12.86 | 11.60 | 11.23 | 11.66 | 10.96                                   | 10.97 | 10.94 | 8.36 | 11.40 | 1.55 | 11.35 | 11.96 | 10.93 | 11.23 | 10.68 | 12.24 | 9.94  | 11.59 | 9.89  | 11.09 | 0.82 |
| 0.50     |                              |   |   |      |       | 9.40                         | 12.02 | 11.66 | 11.03 | 1.42  | 19.49                    | 17.34 | 20.92 | 19.25 | 1.80 | 13.28 | 12.04 | 10.80 | 10.36 | 10.77 | 10.14                                   | 10.19 | 10.18 | 7.55 | 10.59 | 1.55 | 11.13 | 11.63 | 10.76 | 10.96 | 10.42 | 11.99 | 9.75  | 11.35 | 9.70  | 10.85 | 0.79 |
| 0.75     |                              |   |   |      |       | 9.16                         | 11.68 | 11.32 | 10.72 | 1.36  | 19.38                    | 17.35 | 20.87 | 19.20 | 1.77 | 12.87 | 11.56 | 10.43 | 9.87  | 10.25 | 9.68                                    | 9.77  | 9.76  | 7.09 | 10.14 | 1.56 | 10.77 | 11.24 | 10.42 | 10.59 | 10.09 | 11.67 | 9.44  | 10.98 | 9.33  | 10.50 | 0.78 |
| 1.00     |                              |   |   |      |       | 9.02                         | 11.48 | 11.11 | 10.53 | 1.33  | 19.49                    | 17.40 | 20.98 | 19.29 | 1.80 | 12.65 | 11.33 | 10.30 | 9.50  | 10.02 | 9.46                                    | 9.52  | 9.48  | 6.81 | 9.89  | 1.58 | 10.44 | 10.93 | 10.07 | 10.24 | 9.77  | 11.32 | 9.06  | 10.65 | 9.01  | 10.15 | 0.81 |
| 1.25     |                              |   |   |      |       | 8.78                         | 11.21 | 10.80 | 10.26 | 1.30  | 19.44                    | 17.32 | 20.85 | 19.20 | 1.78 | 12.21 | 10.99 | 9.99  | 9.01  | 9.62  | 9.18                                    | 9.02  | 9.15  | 6.34 | 9.50  | 1.60 | 10.01 | 10.52 | 9.62  | 9.84  | 9.33  | 10.83 | 8.68  | 10.22 | 8.45  | 9.72  | 0.80 |
| 1.50     |                              |   |   |      |       | 8.66                         | 10.98 | 10.51 | 10.05 | 1.23  | 19.40                    | 17.22 | 20.80 | 19.14 | 1.80 | 11.74 | 10.52 | 9.49  | 8.52  | 9.27  | 8.75                                    | 8.64  | 8.87  | 5.99 | 9.08  | 1.56 | 9.64  | 10.18 | 9.23  | 9.96  | 8.96  | 10.46 | 8.25  | 9.84  | 8.06  | 9.34  | 0.81 |
| 1.75     |                              |   |   |      |       | 8.45                         | 10.75 | 10.26 | 9.82  | 1.21  | 19.33                    | 17.15 | 20.66 | 19.05 | 1.77 | 11.14 | 9.97  | 8.83  | 7.81  | 8.60  | 8.24                                    | 8.09  | 8.30  | 5.41 | 8.49  | 1.56 | 9.15  | 9.68  | 8.63  | 8.97  | 8.45  | 9.89  | 7.76  | 9.35  | 7.53  | 8.83  | 0.81 |
| 2.00     |                              |   |   |      |       | 8.38                         | 10.64 | 10.17 | 9.73  | 1.19  | 19.22                    | 16.99 | 20.58 | 18.93 | 1.81 | 10.71 | 9.31  | 8.11  | 7.27  | 7.96  | 7.66                                    | 7.55  | 7.71  | 4.90 | 7.91  | 1.56 | 8.91  | 9.42  | 8.26  | 8.63  | 8.17  | 9.60  | 7.36  | 8.96  | 7.15  | 8.50  | 0.85 |
| 2.25     |                              |   |   |      |       | 8.41                         | 10.64 | 10.25 | 9.76  | 1.19  | 19.08                    | 16.93 | 20.57 | 18.86 | 1.83 | 10.15 | 8.74  | 7.52  | 6.63  | 7.34  | 7.10                                    | 7.06  | 7.03  | 4.43 | 7.33  | 1.54 | 8.76  | 9.18  | 7.94  | 8.42  | 7.96  | 9.34  | 7.13  | 8.71  | 6.88  | 8.25  | 0.86 |
| 2.50     |                              |   |   |      |       | 8.46                         | 10.66 | 10.35 | 9.83  | 1.19  | 19.01                    | 16.87 | 19.99 | 18.63 | 1.60 | 9.65  | 8.16  | 7.06  | 6.16  | 6.93  | 6.60                                    | 6.66  | 6.56  | 4.05 | 6.87  | 1.50 | 8.59  | 9.06  | 7.68  | 8.25  | 7.80  | 9.15  | 6.92  | 8.58  | 6.64  | 8.08  | 0.89 |
| 2.75     |                              |   |   |      |       | 8.58                         | 10.75 | 10.48 | 9.94  | 1.18  | 18.89                    | 16.71 | 19.49 | 18.36 | 1.46 | 9.37  | 7.91  | 6.89  | 5.91  | 6.72  | 6.38                                    | 6.46  | 6.36  | 3.83 | 6.65  | 1.49 | 8.64  | 9.01  | 7.63  | 8.26  | 7.81  | 9.08  | 6.88  | 8.58  | 6.66  | 8.06  | 0.88 |
| 3.00     |                              |   |   |      |       | 8.66                         | 10.77 | 10.48 | 9.97  | 1.14  | 18.77                    | 16.57 | 20.08 | 18.47 | 1.77 | 9.16  | 7.71  | 6.85  | 5.66  | 6.57  | 6.26                                    | 6.38  | 6.19  | 3.70 | 6.49  | 1.47 | 8.57  | 8.90  | 7.55  | 8.18  | 7.76  | 8.95  | 6.67  | 8.43  | 6.56  | 7.95  | 0.89 |

C

| time (h) | pMBECs, no treatment (Exp A)                                                                  |       |       |       |       | pMBECs, no treatment (Exp B) |      |       |       |       | pMBECs +B78chOVA (Exp A) |       |       |       |       |      |      |      |      |       | pMBECs +B78chOVA +GM6001 (20µM) |       |       |      |       |      |       |      |       |      |       |       |
|----------|-----------------------------------------------------------------------------------------------|-------|-------|-------|-------|------------------------------|------|-------|-------|-------|--------------------------|-------|-------|-------|-------|------|------|------|------|-------|---------------------------------|-------|-------|------|-------|------|-------|------|-------|------|-------|-------|
|          | sample                                                                                        |       |       |       |       | sample                       |      |       |       |       | sample                   |       |       |       |       |      |      |      |      |       | sample                          |       |       |      |       |      |       |      |       |      |       |       |
|          | 1                                                                                             | 2     | 3     | mean  | STDEV | 1                            | 2    | 3     | mean  | STDEV | 1                        | 2     | 3     | 4     | 5     | 6    | 7    | 8    | 9    | mean  | STDEV                           | 1     | 2     | 3    | 4     | 5    | 6     | 7    | 8     | 9    | mean  | STDEV |
|          | Values expressed relative to first time point set to 100 % (orange field of the upper table). |       |       |       |       |                              |      |       |       |       |                          |       |       |       |       |      |      |      |      |       |                                 |       |       |      |       |      |       |      |       |      |       |       |
| start(0) | 85.9                                                                                          | 108.3 | 105.8 | 100.0 | 12.3  | 102.8                        | 89.5 | 107.7 | 100.0 | 9.4   | 120.3                    | 111.9 | 101.7 | 100.4 | 102.0 | 96.3 | 96.2 | 96.3 | 74.9 | 100.0 | 12.4                            | 101.5 | 107.8 | 98.5 | 101.9 | 96.1 | 110.3 | 89.4 | 105.0 | 89.5 | 100.0 | 7.4   |
| 0.25     | 83.5                                                                                          | 105.6 | 103.3 | 97.4  | 12.1  | 100.0                        | 88.4 | 106.3 | 98.2  | 9.1   | 109.6                    | 100.1 | 90.3  | 87.4  | 90.8  | 85.3 | 85.4 | 85.2 | 65.1 | 88.8  | 12.1                            | 99.0  | 104.8 | 95.4 | 98.0  | 93.2 | 106.8 | 86.7 | 101.1 | 86.3 | 96.8  | 7.2   |
| 0.50     | 81.9                                                                                          | 104.7 | 101.5 | 96.0  | 12.4  | 98.4                         | 87.5 | 105.6 | 97.2  | 9.1   | 103.4                    | 93.7  | 84.1  | 80.7  | 83.9  | 79.0 | 79.3 | 79.3 | 58.8 | 82.5  | 12.1                            | 97.2  | 101.5 | 93.9 | 95.7  | 91.0 | 104.7 | 85.1 | 99.1  | 84.7 | 94.8  | 6.9   |
| 0.75     | 79.7                                                                                          | 101.7 | 98.5  | 93.3  | 11.9  | 97.8                         | 87.6 | 105.4 | 96.9  | 8.9   | 100.2                    | 90.0  | 81.2  | 76.8  | 79.8  | 75.3 | 76.0 | 76.0 | 55.2 | 78.9  | 12.1                            | 94.0  | 98.1  | 90.9 | 92.4  | 88.1 | 101.8 | 82.4 | 95.8  | 81.  |       |       |

Supplementary Table S2. **A** lists the initial absolute TEER values. **B** lists the absolute TEER values subtracted by mean TEER values of the empty filters. **C** shows the calculation of the data shown in Supplementary Figure 1B.
