# Supplementary material for: Compromised Blood-Brain Barrier Junctions Enhance Melanoma Cell Intercalation and Extravasation
Source: Cancers (Basel). 2023 Oct 20;15(20):5071. doi: 10.3390/cancers15205071 (PMC10605101; doi:10.3390/cancers15205071)
Supplement: Supplementary file 1 [file cancers-15-05071-s001.zip]

Archive with 8 entries (8 files):
- Legend of Videos.pdf
- Saltarin_et_al_Supplementary figures_Revision02.pdf
- Saltarin_et_al_Supplementary tables_Revision02.pdf
- Video S1.mp4
- Video S2.mp4
- Video S3.mp4
- Videos S4.mp4
- Videos S5.mp4
